# Supplementary material for: Dark-field microscopy studies of polarization-dependent plasmonic resonance of single gold nanorods: rainbow nanoparticles
Source: Royal Society of Chemistry journal article supplement (doi:10.1039/c1nr10336a), 2011-01-01
Supplement: c1nr10336a.pdf [file c1nr10336a.pdf]

## Supporting information

# Dark-field microscopy studies of polarization- dependent plasmonic resonance of single gold nanorods: Rainbow nanoparticles

*Youju Huang and Dong-Hwan Kim\**

School of Chemical and Biomedical Engineering, Nanyang Technological University, 637457, Singapore

---

\* Corresponding author: E-mail: [dhkim@ntu.edu.sg](mailto:dhkim@ntu.edu.sg); Tel: 65-67904111; Fax: 65-67911761 (DH. Kim)

**S-TABLE 1.** Detailed information regarding the average size of the gold nanorods. Each data point was obtained from at least 150 particles.

| Sample number | Length/nm      | Diameter/nm    | Aspect ratio  |
|---------------|----------------|----------------|---------------|
| AuNR-19       | $48.6 \pm 4.6$ | $18.8 \pm 2.1$ | $2.6 \pm 0.3$ |
| AuNR-29       | $58.5 \pm 5.4$ | $28.9 \pm 2.3$ | $2.0 \pm 0.2$ |
| AuNR-37       | $63.2 \pm 5.2$ | $36.7 \pm 3.1$ | $1.7 \pm 0.2$ |
| AuNR-41       | $74.7 \pm 6.3$ | $40.6 \pm 4.2$ | $1.8 \pm 0.2$ |

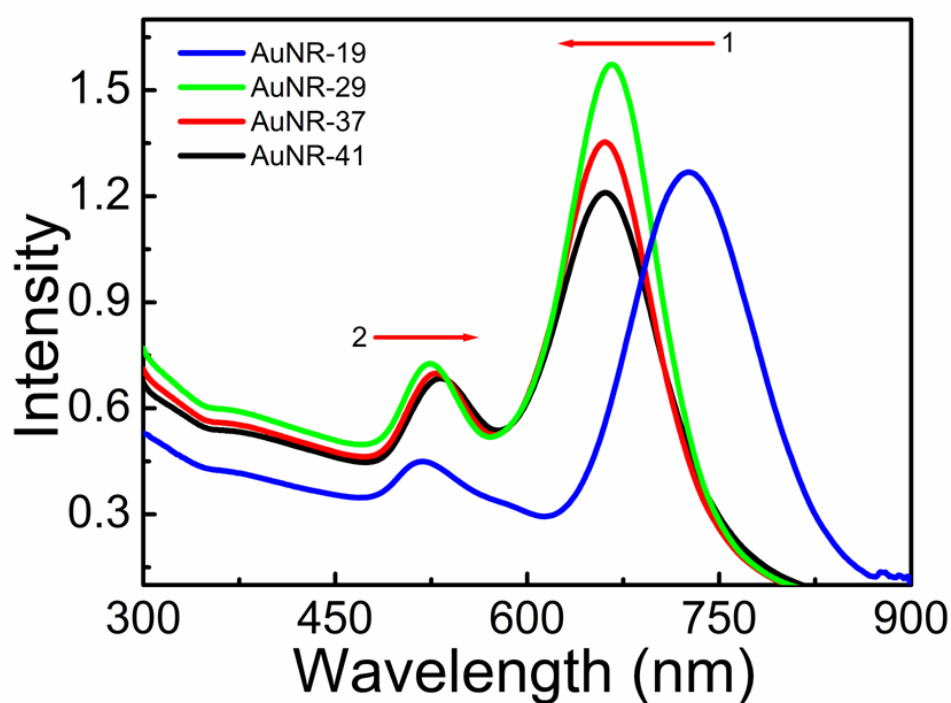

**S-Figure 1.** UV-Vis spectra of gold nanorods with different diameters (AuNR-18 (a), AuNR-29 (b), AuNR-37 (c) and AuNR-41 (d)). A decreased aspect ratio of the AuNRs results in a blue shift (arrow 1) in the longitudinal surface plasmon peak, whereas an increased diameter of the AuNRs causes a red shift in the transverse peak (arrow 2).

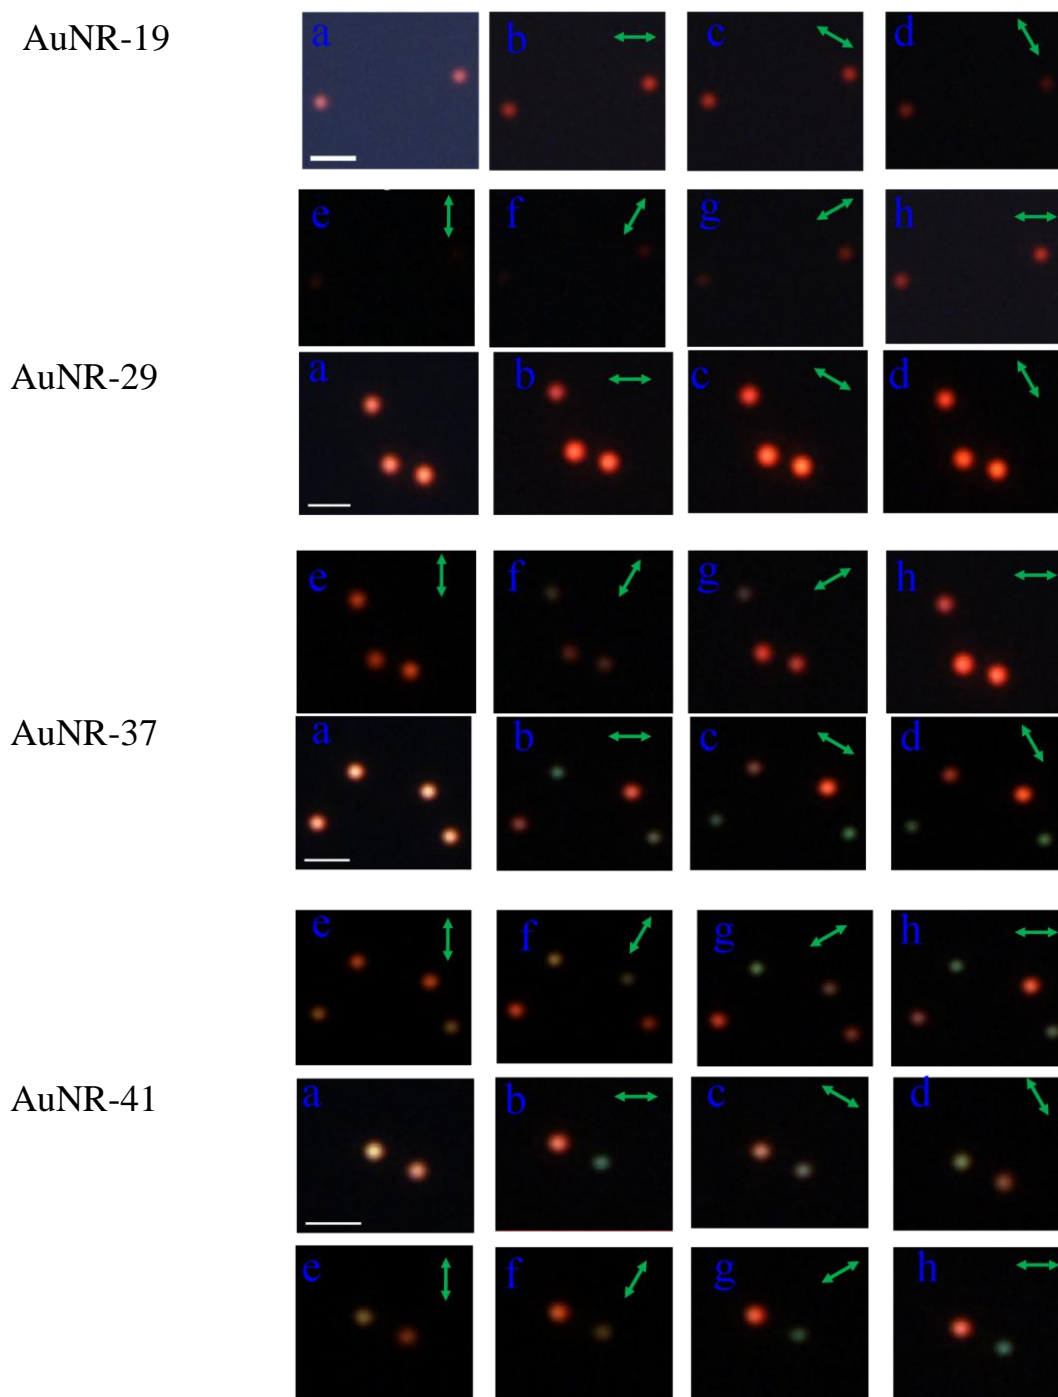

**S-Figure 2.** Dark-field images of single nanorods of AuNR-19, AuNR-29, AuNR-37 and AuNR-41 without polarization (a) and at different polarization angles (b: 0°; c: 30°; d: 60°; e: 90°; f: 120°; g: 150°; h: 180°). All scale bars represent 2  $\mu\text{m}$ . Green double-arrows represent the incident light polarization.

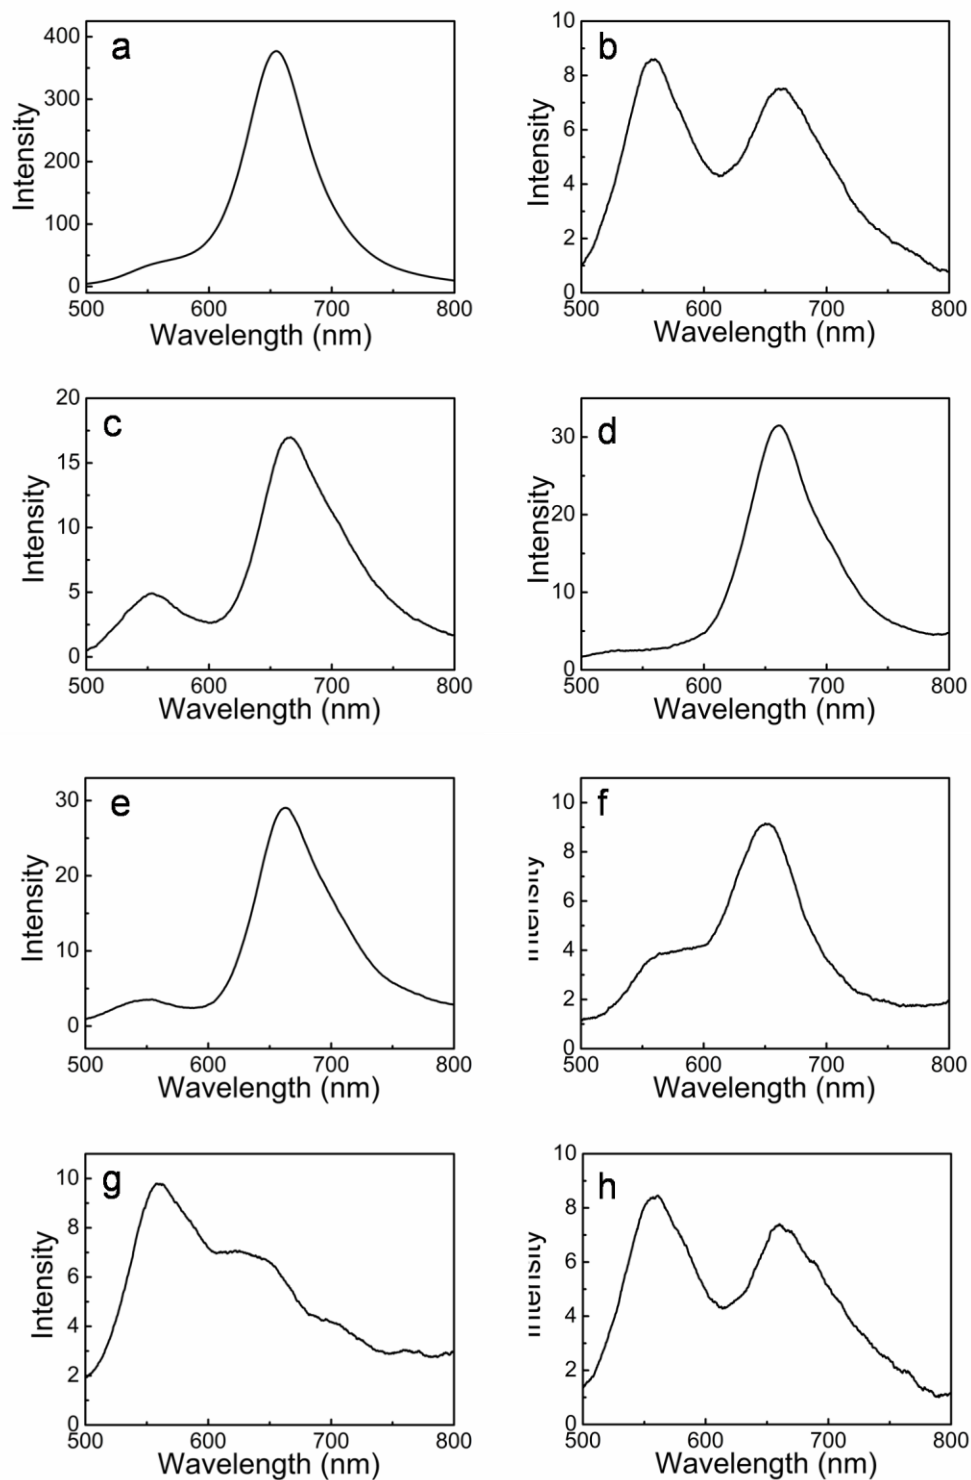

**S-Figure 3.** The corresponding background subtracted LSPR spectra of the single AuNR shown in Figure 6 without polarization (a) and at different polarization angles (b: 0° ; c: 30° ; d: 60° ; e: 90° ; f: 120° ; g: 150° ; f: 180°).
